# Supplementary material for: Mucosal Expression of T Cell Gene Variants Is Associated with Differential Resistance to Teladorsagia circumcincta
Source: PubMed Central journal article supplement (PMC5156391; doi:10.1371/journal.pone.0168194), 2016-12-14
Supplement: pone.0168194.s002.pdf [file pone.0168194.s002.pdf]

**Table S2**

Primer sequences used for RT-qPCR

## A. Transcription factors

| Gene           | Sequence (5'-3')              | T <sub>m</sub> (°C) | Primer vol (10 mM) |
|----------------|-------------------------------|---------------------|--------------------|
| <i>TBX21</i>   | F: CCTGTTGTGGTCCAAGTTC        | 60                  | 0.5 µl             |
| XM_004012818   | R: CGGTAATGGCTGGTGGGCTC       |                     |                    |
| <i>GATA3</i>   | F: CCACAAGATGAACGGACAG        | 62                  | 1.0                |
| LN848231       | R: GGCATTTCTTCTCCACAGATCGT    |                     |                    |
| <i>GATA3v1</i> | F: GCGAGATCCAGCACAGGCC        | 60                  | 0.5                |
| LN848232       | R: GTTCTGTCCGTTTCATCTTGTGG    |                     |                    |
| <i>RORC2</i>   | F: CGCTGTGCCCACCGACTCACCGAG   | 62                  | 0.25               |
| LN848233       | R: TGACCAGCACCACTTCCATG       |                     |                    |
| <i>RORC2v1</i> | F: TTGAAGGCTGCAGTGAAGTC       | 63                  | 0.5                |
| LN848234       | R: GGCATTGATGAGCACGAGG        |                     |                    |
| <i>RORC1</i>   | F: CCACAGAGACACCACCGAGC       | 60                  | 0.5                |
| XM_015090435.1 | R: CTGACGGGTGCAGGAGTAGG       |                     |                    |
| <i>RORAv1</i>  | F: GTGATCGCAGCGATGAAAGC       | 60                  | 0.35               |
| LN848235       | R: CCTTGCAGCCTTCACATGTAATG    |                     |                    |
| <i>RORAv2</i>  | F: AGTTCTCTGCTGCAGTTGCTAAC    | 62                  | 0.5                |
| LN848236       | R: GACGAGCTCATGGGCAAGG        |                     |                    |
| <i>RORAv3</i>  | F: TGCGCAGACAGAGCTATTCC       | 62                  | 0.5                |
| LN848237       | R: TGGGTCTTCTTTGTTACTGAGATACC |                     |                    |
| <i>RORAv4</i>  | F: GCAGCTTTCTTCTGGTGTGTC      | 60                  | 0.5                |
| LN848238       | R: TGGGTCTTCTTTGTTACTGAGATACC |                     |                    |
| <i>RORAv5</i>  | F: GGCTTTCTGTGGATGGGATC       | 60                  | 0.35               |
| LN848239       | R: TGGGTCTTCTTTGTTACTGAGATACC |                     |                    |

## B. Cytokine receptors

| Gene             | Sequence (5'-3')              | T <sub>m</sub> (°C) | Primer vol (10 mM) |
|------------------|-------------------------------|---------------------|--------------------|
| <i>IL23R</i>     | F: GGTGTACGTGAAGAGTTTAGAGACAG | 62                  | 0.2 µl             |
| LN868336         | R: CAGTACATTTGAAGCTTGGACCC    |                     |                    |
| <i>IL23Rv1</i>   | F: ACAGGTCGTAAGAGAGCGACAAAG   | 58                  | 0.5                |
| LN868337         | R: AATCCCTCCATGACACCAACTGAA   |                     |                    |
| <i>IL23Rv2</i>   | F: CATAGACACAAATTTAGAGACAGAA  | 58                  | 0.5                |
| LN868338         | R: CAGTACATTTGAAGCTTGGACCC    |                     |                    |
| <i>IL23Rv3</i>   | F: ACTTGGAACGTAAGCTAAATTCCT   | 58                  | 0.5                |
| LN868339         | R: AATTCTGACTGTTGCTCATATGTAA  |                     |                    |
| <i>IL23Rv4</i>   | F: TCCTGAAATAGACAACGGGAAAC    | 58                  | 0.5                |
| LN868340         | R: AGAACTGACAGCATAACAGCAAA    |                     |                    |
| <i>IL23Rv5</i>   | F: AAATAGTTCCCTCAGGTCACAATG   | 58                  | 0.5                |
| LN868341         | R: TCTTTTAATTCAGAAGTAAGGTGT   |                     |                    |
| <i>IL12RB1</i>   | F: AGGATTCGGTGTCTGTGGACTGGA   | 60                  | 0.2                |
| LN878970         | R: CAGACGCTTGGTTGCTGTCTCTCT   |                     |                    |
| <i>IL12RB1v1</i> | F: TATCCGTGCTCCACAATGTCACTCT  | 60                  | 0.5                |
| LN878971         | R: GCAAAGCTGCTCTTGGACATCTTGA  |                     |                    |
| <i>IL12RB1v2</i> | F: CTGCTCTTCTCAAGGACCGGATGGG  | 62                  | 0.5                |
| LN878972         | R: TTCAGGGGGGATGCACAAGAGGAGAA |                     |                    |
| <i>IL12RB1v3</i> | F: CTGAGCTGGAGCAGCCCTGTGTGCAT | 60                  | 0.5                |
| LN878973         | R: GCTGCTCATGTAAGGCCACCTGCC   |                     |                    |
| <i>IL12RB1v4</i> | F: CACCATACCCAGATGCAGACTCA    | 62                  | 0.5                |
| LN878974         | R: CGCAGAGCCTGTGGCAAAGA       |                     |                    |
| <i>IL17RB</i>    | F: GTTGAAGGCCACCAAGATCTGC     | 62                  | 0.2                |
| LN878975         | R: TGAAGTTCACAGCCATGGAGGG     |                     |                    |
| <i>IL17RBv1</i>  | F: GATCATGAGAGAAGTGTGCTGGG    | 60                  | 0.5                |
| LN878976         | R: GAAGTAACAAACGTGCCTCCAGA    |                     |                    |
| <i>IL17RBv2</i>  | F: CGGGCAGATGTGGACGTTTTTC     | 62                  | 0.5                |
| LN878977         | R: TGAAGTTCACAGCCATGGAGGG     |                     |                    |
| <i>IL17RBv3</i>  | F: TAACTCGAACTTCTGTGGTGGTCC   | 62                  | 0.35               |
| LN878978         | R: GGTGCAGTGGGTCTTCAGTGAG     |                     |                    |
| <i>IL17RA</i>    | F: CAACTGAGGCATCATCACAAGC     | 60                  | 0.2                |
| LN878979         | R: GAAGTTTCTGGATTGGTGGTTGG    |                     |                    |

## C. Reference genes

| Gene           | Sequence (5'-3')         | T <sub>m</sub> (°C) | Primer vol (10 mM) |
|----------------|--------------------------|---------------------|--------------------|
| <i>SDHA</i>    | F: ACCTGATGCTTTGTGCTCTGC | 60                  | 0.5 µl             |
| NM_001190390   | R: CCTGGATGGGCTTGGAGTAA  |                     |                    |
| <i>GAPDH</i>   | F: GGTGATGCTGGTGTGAGTA   | 62                  | 0.8                |
| XP_011952573.1 | R: TCATAAGTCCCTCCACGATG  |                     |                    |
